# Supplementary material for: Increasing the solubility range of polyesters by tuning their microstructure with comonomers
Source: Royal Society of Chemistry journal article supplement (doi:10.1039/c7py00976c), 2017-01-01
Supplement: c7py00976c1.pdf [file c7py00976c1.pdf]

Supporting information for:

# Increasing the solubility range of polyesters by tuning their microstructure with comonomers

Marie A. F. Delgove,<sup>a</sup> Juandré Luchies,<sup>a</sup> Iris Wauters,<sup>b</sup> Geert G.P. Deroover,<sup>b</sup>  
Stefaan M.A. De Wildeman<sup>a</sup> and Katrien V. Bernaerts<sup>a</sup>

<sup>a</sup>Department of Biobased Materials, Maastricht University, P.O. Box 616, 6200MD Maastricht,  
the Netherlands

<sup>b</sup>ChemStream, Drie Eikenstraat 661, B-2650 Edegem, Belgium

### Theoretical diad distribution calculation from semi-quantitative $^{13}\text{C}$ NMR.

The probability to have a  $\omega$ -PDL unit depends on the theoretical degree of polymerization and is corrected with the conversion:

$$P_{\omega-PDL} = \frac{DP_{n,th,\omega-PDL} \cdot conv(\omega-PDL)}{DP_{n,th,\omega-PDL} \cdot conv(\omega-PDL) + DP_{n,th,M} \cdot conv(M)}$$

$$P_M = \frac{DP_{n,th,M} \cdot conv(M)}{DP_{n,th,\omega-PDL} \cdot conv(\omega-PDL) + DP_{n,th,M} \cdot conv(M)}$$

The theoretical diad distributions correspond to the product of the probabilities:

$$\omega-PDL^* - \omega-PDL = P_{\omega-PDL}^2$$

$$M^* - M = P_M^2$$

$$\omega-PDL^* - M = M^* - \omega-PDL = P_{\omega-PDL} \cdot P_M$$

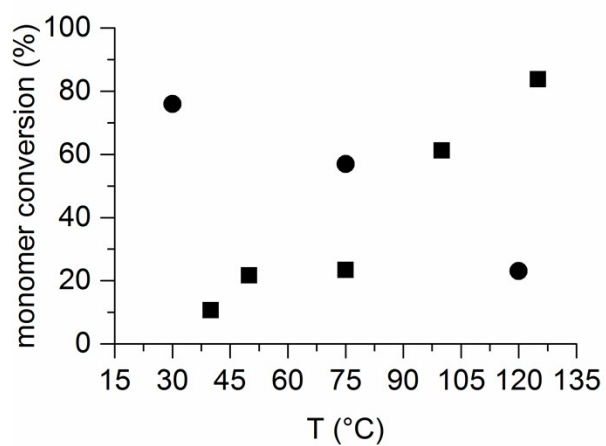

**Figure S1.** Temperature dependence of bulk homopolymerizations (BnOH/ $\omega$ -PDL 1/20 and BnOH/ $\delta$ -UDL 1/15) with  $\omega$ -PDL (black square) and  $\delta$ -UDL (black circle) conversions after 60 min.

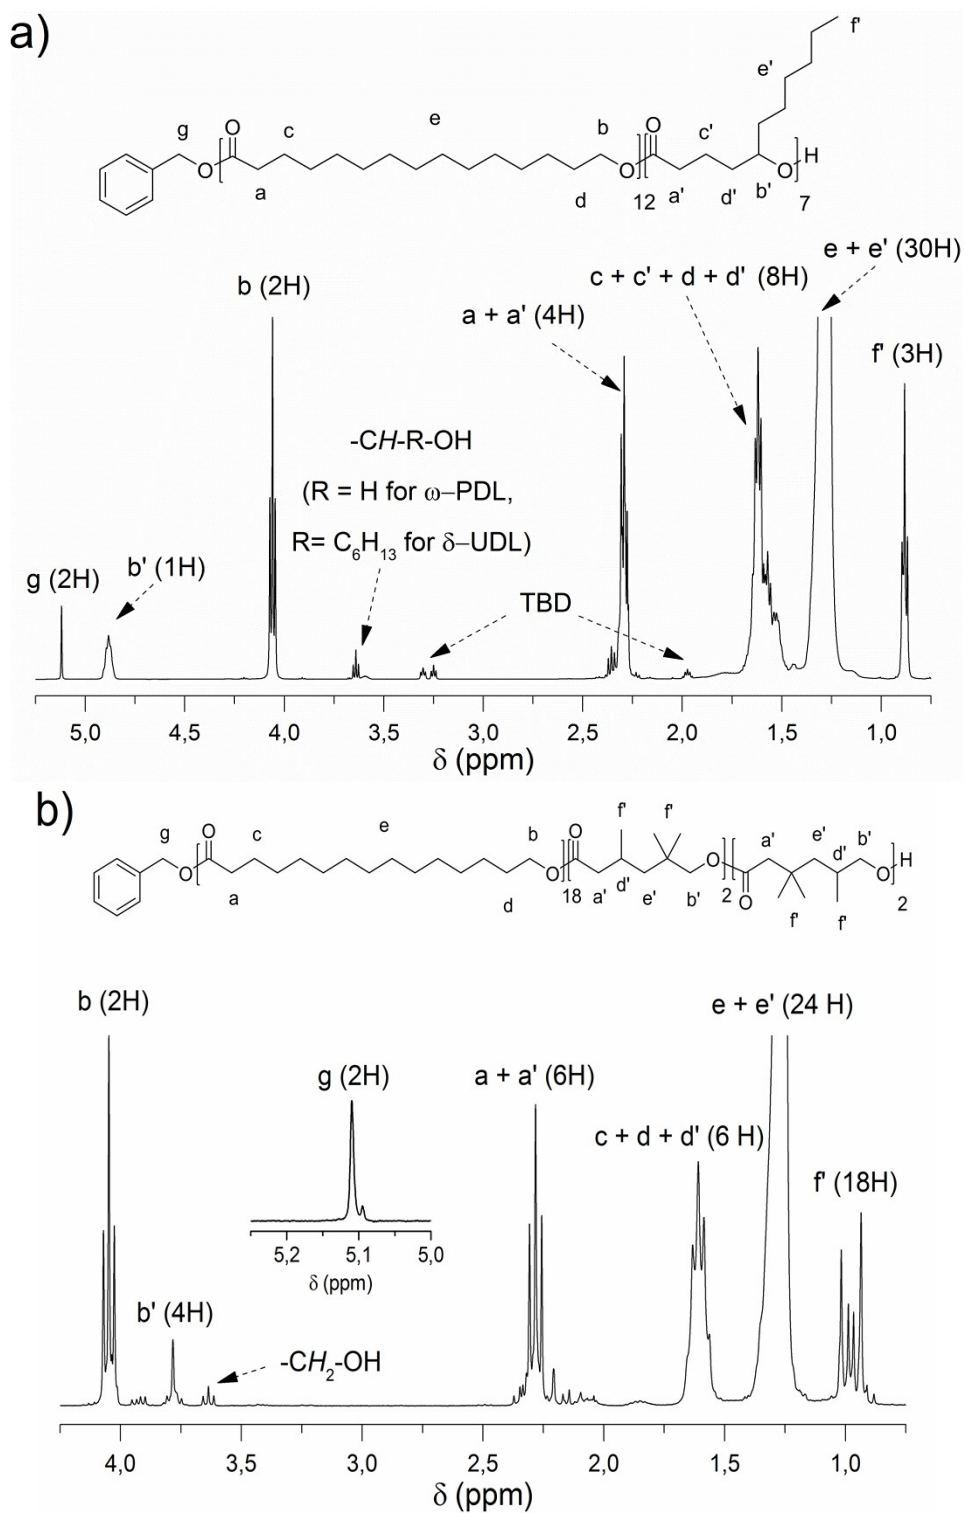

**Figure S2.**  $^1\text{H}$  NMR ( $\text{CDCl}_3$ , 300 MHz) spectrum of purified copolymers a) poly( $\omega$ -PDL-*co*- $\delta$ -UDL) (Table 1, entry **3**); and b) poly( $\omega$ -PDL-*co*-TMCL) (Table 1, entry **6**).

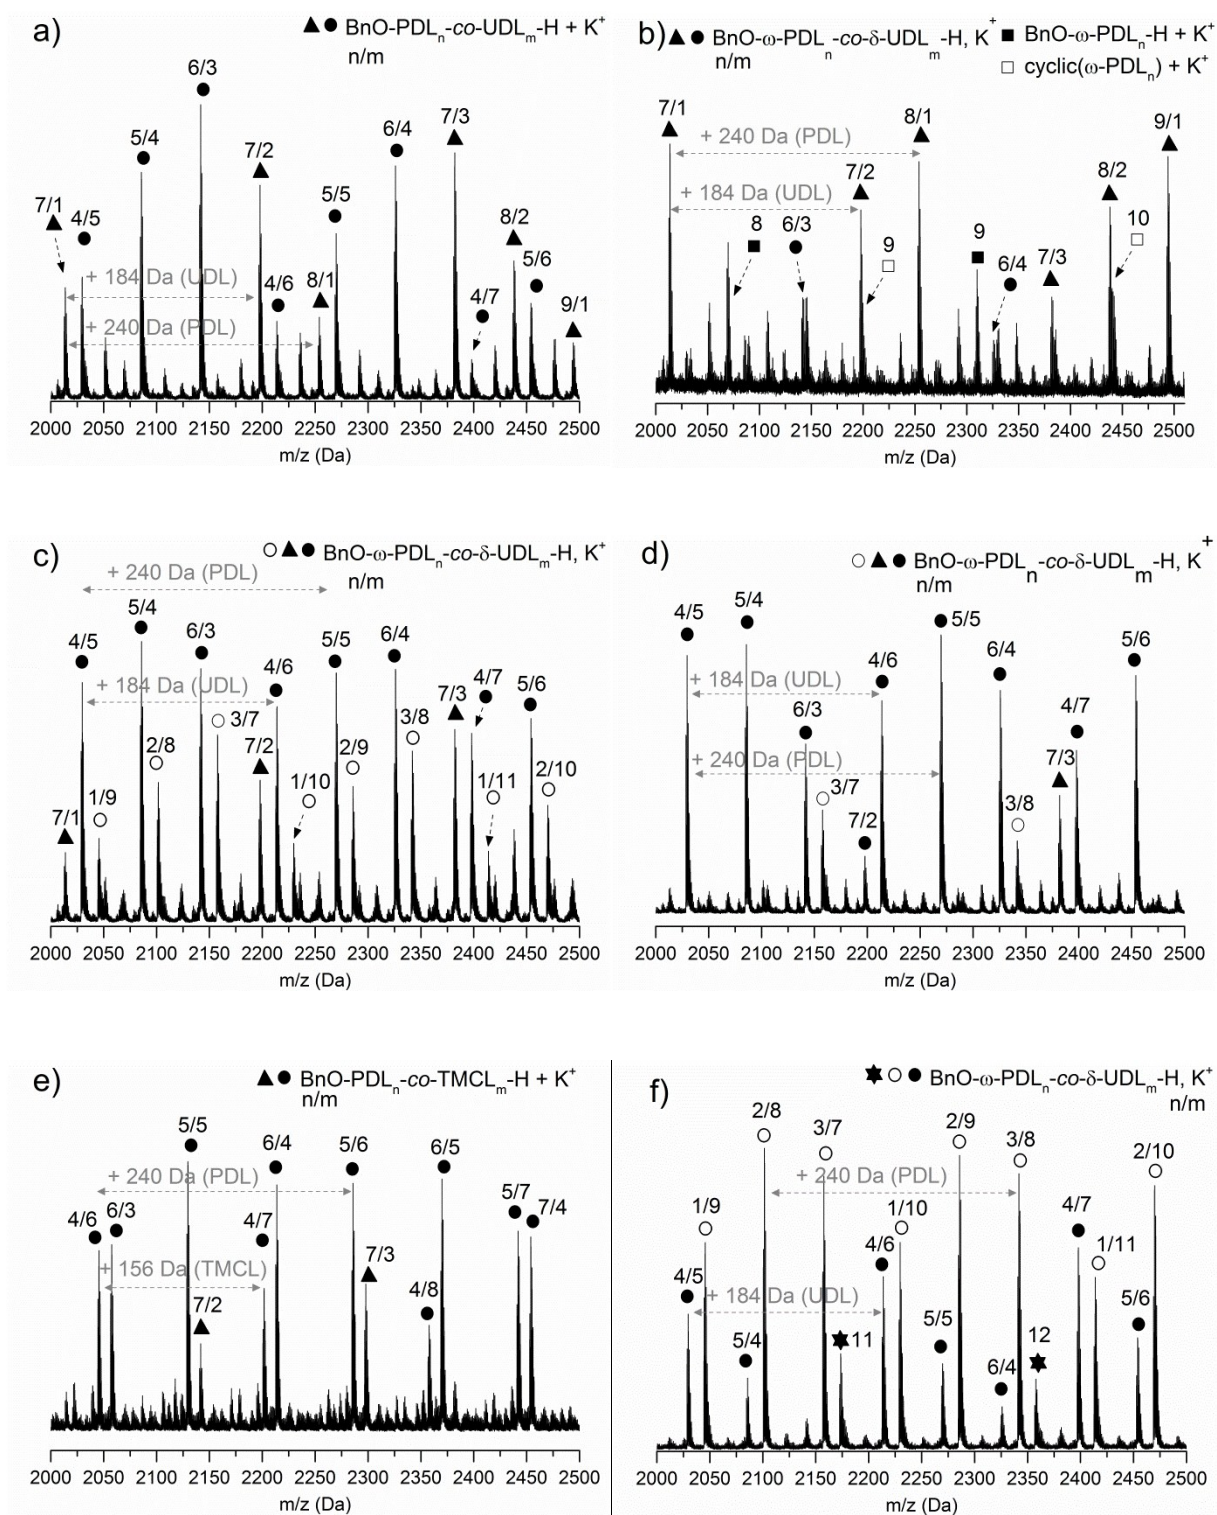

**Figure S3.** MALDI-ToF spectra of a) poly( $\omega$ -PDL-*co*- $\delta$ -UDL) synthesized with a feed ratio of 12/4  $\omega$ -PDL/  $\delta$ -UDL in one-pot; b) poly( $\omega$ -PDL-*co*- $\delta$ -UDL) synthesized with a feed ratio of 12/4  $\omega$ -PDL/  $\delta$ -UDL with  $\omega$ -PDL added to  $\delta$ -UDL; c) poly( $\omega$ -PDL-*co*- $\delta$ -UDL) synthesized with a

feed ratio of 12/4  $\omega$ -PDL/  $\delta$ -UDL with  $\delta$ -UDL added to  $\omega$ -PDL; d) poly( $\omega$ -PDL-co- $\delta$ -UDL) synthesized with a feed ratio of 8/8  $\omega$ -PDL/  $\delta$ -UDL in one-pot; e) poly( $\omega$ -PDL-co-TMCL) with  $\omega$ -PDL/TMCL feed ratio of 8/8 in one-pot, and f) poly( $\omega$ -PDL-co- $\delta$ -UDL) synthesized with a feed ratio of 4/12  $\omega$ -PDL/  $\delta$ -UDL in one-pot. Squares indicate PPDL homopolymers (black for linear and empty for cyclics) and black stars indicate PUDL homopolymers. Black triangles indicate copolymers with  $\omega$ -PDL ratio  $> 0.7$ , empty circles indicate copolymers with  $\omega$ -PDL ratio  $< 0.3$  and black circles indicate copolymers with  $0.3 < \omega$ -PDL ratio  $< 0.7$ .

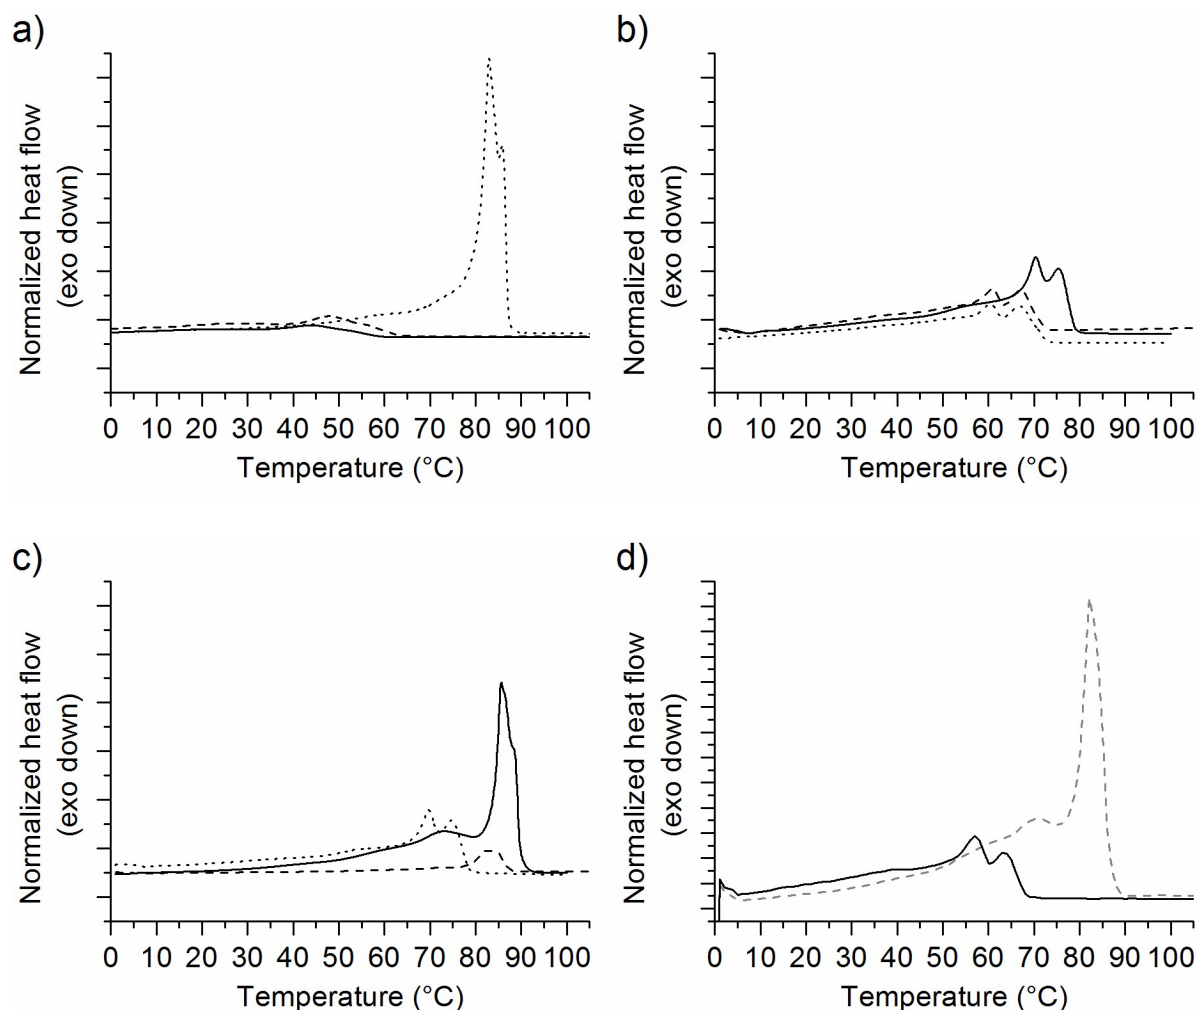

**Figure S4.** DSC thermographs (2<sup>nd</sup> heating) of poly( $\omega$ -PDL-*co*- $\delta$ -UDL) synthesized in one-pot (black full line), with  $\omega$ -PDL addition to  $\delta$ -UDL (black dashed line) and with  $\delta$ -UDL addition to  $\omega$ -PDL (black dotted line) with feeding ratios of  $\omega$ -PDL/  $\delta$ -UDL of a) 4/12, b) 8/8, and c) 12/4. d) DSC thermographs of poly( $\omega$ -PDL-*co*-TMCL) synthesized in one-pot with feeding ratios of  $\omega$ -PDL/TMCL of 8/8 (full line) and 12/4 (dashed line).
